# Supplementary material for: High-pressure structural phase transitions and metallization in layered HfS2under different hydrostatic environments up to 42.1 GPa
Source: Royal Society of Chemistry journal article supplement (doi:10.1039/d2tc01669a), 2022-01-01
Supplement: d2tc01669a1.pdf [file d2tc01669a1.pdf]

ARTICLE

## High-pressure structural phase transitions and metallization in layered $\text{HfS}_2$ under different hydrostatic environments up to 42.1 GPa

Received 22<sup>th</sup> April 2022,  
Accepted 00th January 20xx

DOI: 10.1039/x0xx00000x

Meiling Hong,<sup>ab</sup> Lidong Dai,<sup>\*a</sup> Haiying Hu,<sup>\*a</sup> Xinyu Zhang,<sup>ab</sup> Chuang Lj<sup>ab</sup> and Yu He<sup>ab</sup>

### Supplementary Figures and Table

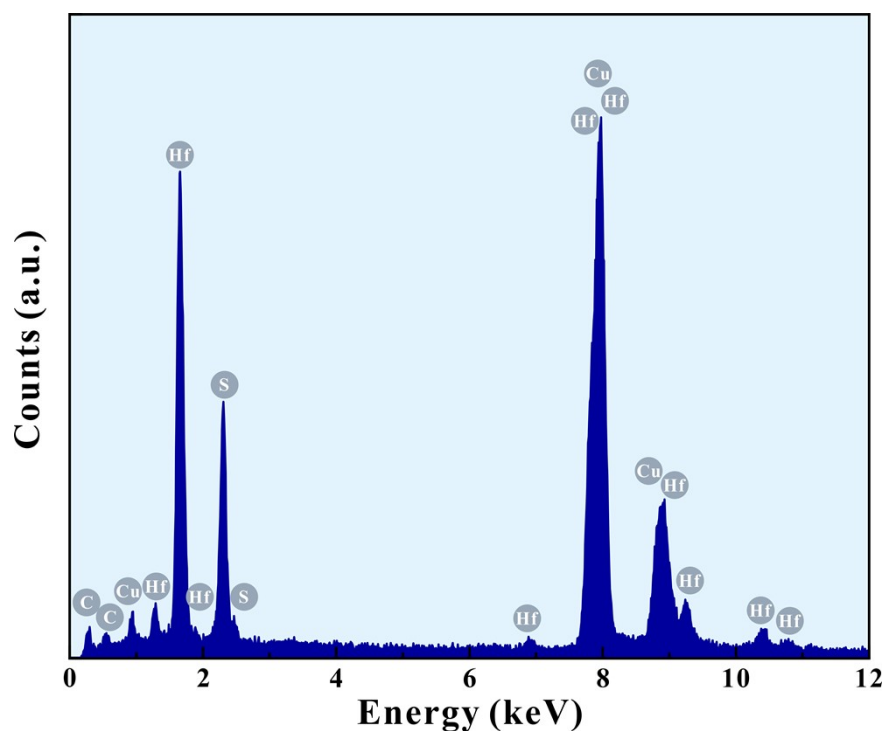

**Supplementary Figure 1.** Transmission electron microscope equipped with an energy dispersive X-ray spectroscopy (TEM-EDS) of the starting  $\text{HfS}_2$  sample.

<sup>a</sup> Key Laboratory of High-temperature and High-pressure Study of the Earth's Interior, Institute of Geochemistry, Chinese Academy of Sciences, Guiyang, Guizhou 550081, China. Email: [dailidong@vip.gyig.ac.cn](mailto:dailidong@vip.gyig.ac.cn), [huhaiying@vip.gyig.ac.cn](mailto:huhaiying@vip.gyig.ac.cn)

<sup>b</sup> University of Chinese Academy of Sciences, Beijing 100049, China

Electronic Supplementary Information (ESI) available. See DOI: 10.1039/x0xx00000x

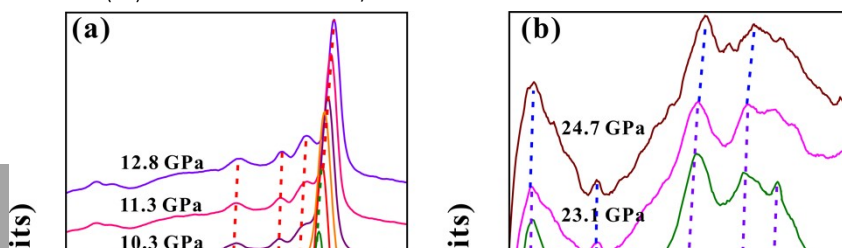

**Supplementary Figure 3.** (a) and (b) represent the optical microscope images of sample chamber under non-hydrostatic and hydrostatic conditions, respectively. In here, PM stands for pressure medium. (c) The relations between deviatoric stress and pressure under different hydrostatic environments.

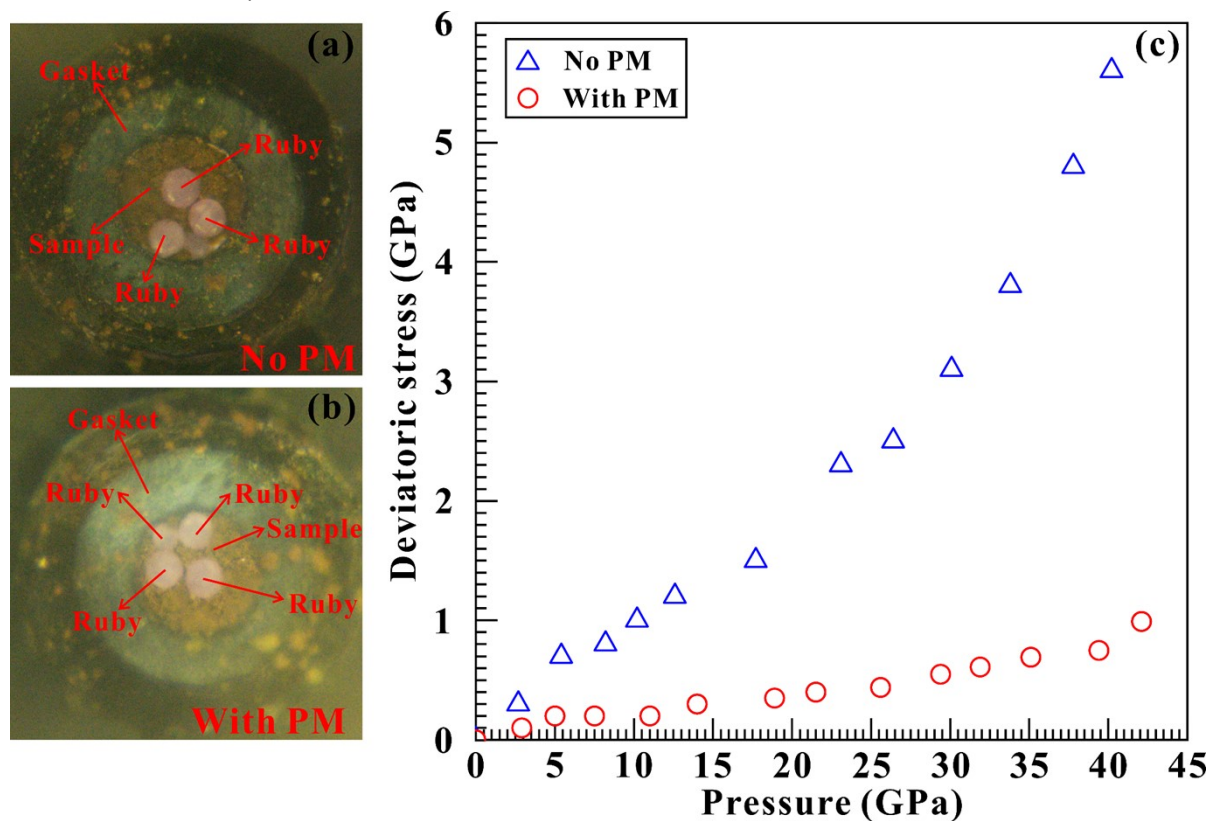

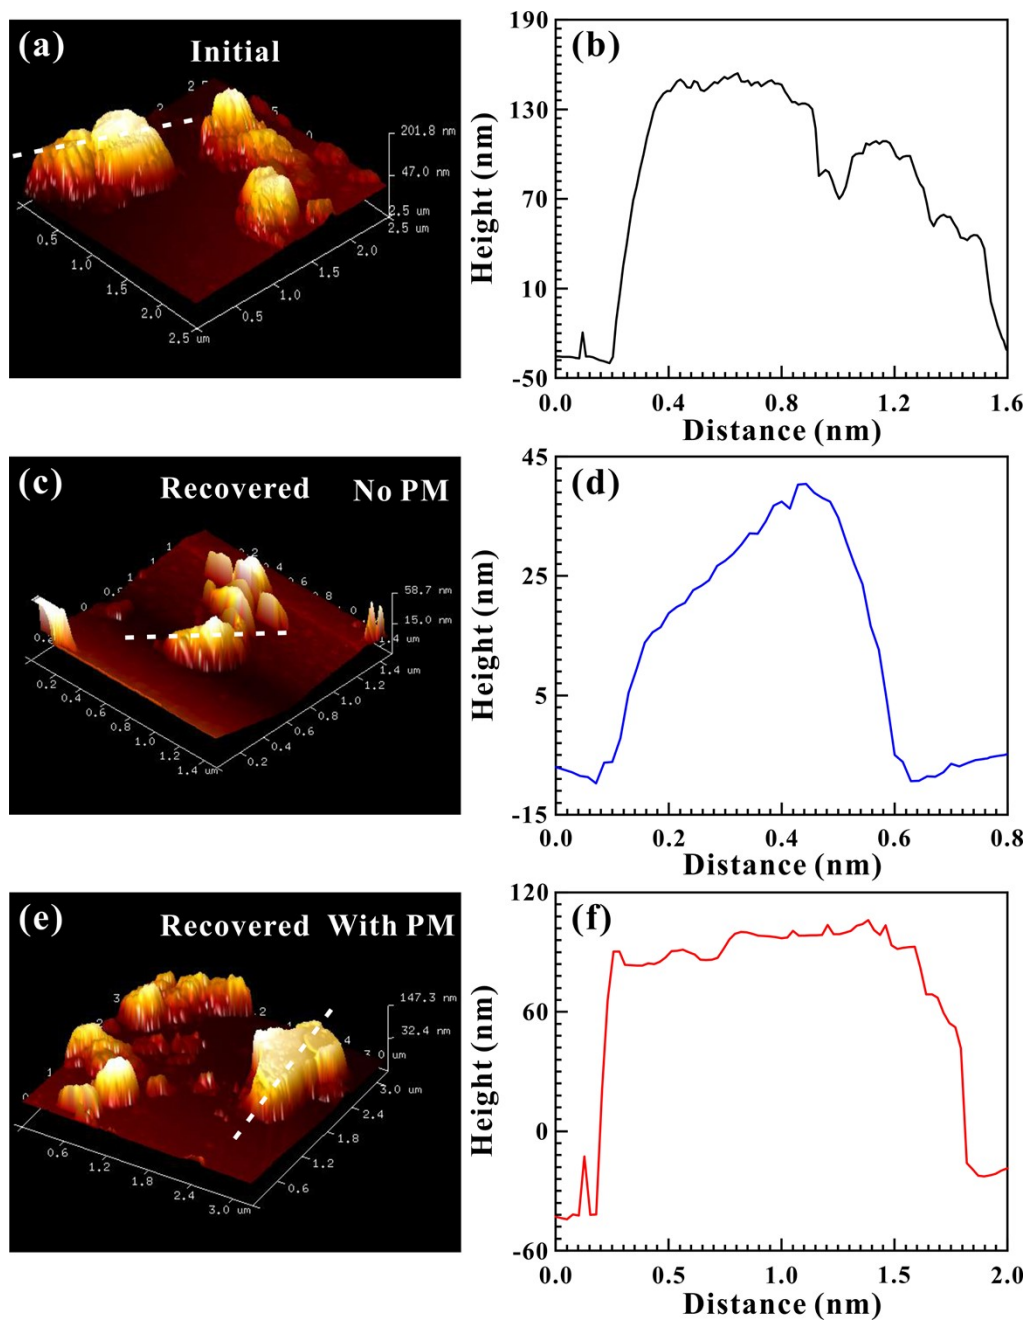

**Supplementary Figure 4.** Three-dimensional surface topography images of atomic force microscopy (AFM) and their correspondent distance-height relationships for  $\text{HfS}_2$ . Herein, (a) and (b) represent the starting sample; (c) and (d) are the recovered sample decompressed from 38.2 GPa under non-hydrostatic condition; (e) and (f) stand for the recovered sample released from 37.9 GPa under hydrostatic condition. Herein, PM represents pressure medium.

**Supplementary Table 1.** The relationship between diffraction angle ( $2\theta$ ) and full width at half maximum (FWHM) for  $\text{HfS}_2$ .

| $2\theta$ (°) | FWHM ( $\text{cm}^{-1}$ ) |
|---------------|---------------------------|
| 14.99         | 0.210±0.033               |
| 28.31         | 0.171±0.040               |
| 30.38         | 0.219±0.040               |
| 32.22         | 0.272±0.065               |
| 42.07         | 0.328±0.042               |
| 46.37         | 0.350±0.111               |
| 50.18         | 0.179±0.039               |
| 52.70         | 0.222±0.052               |
| 55.28         | 0.401±0.048               |
| 58.66         | 0.183±0.033               |
| 59.87         | 0.312±0.097               |
| 60.95         | 0.279±0.0908              |
| 63.36         | 0.410±0.062               |
| 67.54         | 0.376±0.100               |
